# Supplementary material for: Thermodynamic properties and structure of gaseous BMoO4
Source: Royal Society of Chemistry journal article supplement (doi:10.1039/c2dt31372c), 2012-10-04
Supplement: c2dt31372c.pdf [file c2dt31372c.pdf]

## Supporting Information.

# Thermodynamic properties and structure of the gaseous $\text{BMoO}_4$

*Sergey I. Lopatin,\* Andrej I. Panin and Sergey M. Shugurov*

Faculty of Chemistry, Saint Petersburg State University, Saint Petersburg, Russia

**Table S1.** Equilibrium data for the gas-phase reaction (6).

**Table S2.** Thermodynamic functions of  $\text{BMoO}_4$ ,  $\text{BWO}_4$ ,  $\text{BPO}_3$  and  $\text{BPO}_4$  molecules

**Tables S3-S6.** A summary concerning all the structures obtained for  $\text{BMoO}_4$ ,  $\text{BWO}_4$ ,  $\text{BPO}_3$  and  $\text{BPO}_4$  molecules.

**Table S1** Equilibrium Data for the Gas Phase Reaction (7) for the  $B_2O_3 - Ga_2O - Mo$  System.

| T, K           | $p_i$ , atm               |                          |                          |                           | $-\Delta_r H^0$ , kJ |
|----------------|---------------------------|--------------------------|--------------------------|---------------------------|----------------------|
|                | $B_2O_3$<br>$\times 10^5$ | $MoO_3$<br>$\times 10^6$ | $MoO_2$<br>$\times 10^6$ | $BMoO_4$<br>$\times 10^6$ |                      |
| 1564           | 3.9                       | 1.7                      | 0.5                      | 1.3                       | 276.0                |
| 1566           | 3.8                       | 1.3                      | 0.7                      | 1.2                       | 273.7                |
| 1561           | 3.3                       | 1.8                      | 0.9                      | 1.5                       | 273.0                |
| 1568           | 3.1                       | 0.9                      | 0.5                      | 1.0                       | 281.1                |
| 1566           | 2.2                       | 1.0                      | 0.5                      | 0.6                       | 270.5                |
| 1571           | 2.2                       | 0.5                      | 0.3                      | 0.6                       | 287.1                |
| 1588           | 1.9                       | 1.1                      | 0.7                      | 1.3                       | 290.6                |
| 1588           | 1.8                       | 0.8                      | 0.4                      | 0.4                       | 271.8                |
| 1521           | 8.6                       | 1.7                      | 8.1                      | 9.8                       | 274.9                |
| 1524           | 7.9                       | 4.3                      | 5.8                      | 9.0                       | 266.8                |
| 1537           | 9.0                       | 4.1                      | 7.6                      | 10.7                      | 268.8                |
| 1539           | 8.7                       | 4.1                      | 7.0                      | 8.3                       | 264.1                |
| 1539           | 6.2                       | 3.7                      | 5.8                      | 7.4                       | 269.2                |
| 1533           | 6.2                       | 3.0                      | 4.6                      | 4.9                       | 263.4                |
| 1529           | 1.9                       | 2.4                      | 3.8                      | 4.7                       | 282.0                |
| 1547           | 0.9                       | 3.6                      | 6.5                      | 5.0                       | 284.1                |
| 1547           | 0.9                       | 1.7                      | 5.3                      | 3.5                       | 287.2                |
| 1544           | 0.4                       | 1.7                      | 4.1                      | 1.5                       | 278.7                |
| Average value: |                           |                          |                          |                           | 275.7±8.2            |

**Table S2.** Thermodynamic functions: free energy function  $\Phi^\circ$ , entropy  $S^\circ$ , enthalpy increment  $H(T)-H(0\text{ K})$  and heat capacity  $C_{p,m}^\circ$ , of gaseous  $\text{BMoO}_4$ ,  $\text{BWO}_4$ ,  $\text{BPO}_3$  and  $\text{BPO}_4$  at selected temperatures in the temperature range 298.15 K to 2500 K

| T                                 | $\Phi_m^\circ(T)^a$                              | $S_m^\circ(T)$                                   | $H(T)-H(0\text{ K})$           | $C_{p,m}^\circ(T)$                               |
|-----------------------------------|--------------------------------------------------|--------------------------------------------------|--------------------------------|--------------------------------------------------|
| K                                 | $\text{J}\cdot\text{K}^{-1}\cdot\text{mol}^{-1}$ | $\text{J}\cdot\text{K}^{-1}\cdot\text{mol}^{-1}$ | $\text{J}\cdot\text{mol}^{-1}$ | $\text{J}\cdot\text{K}^{-1}\cdot\text{mol}^{-1}$ |
| <b><math>\text{BMoO}_4</math></b> |                                                  |                                                  |                                |                                                  |
| 298.15                            | 299.6                                            | 368.7                                            | 20600.6                        | 69.1                                             |
| 1000                              | 401.6                                            | 501.2                                            | 99562.9                        | 99.6                                             |
| 1100                              | 411.2                                            | 513.0                                            | 111965.2                       | 101.8                                            |
| 1200                              | 420.1                                            | 523.9                                            | 124493.4                       | 103.7                                            |
| 1300                              | 428.5                                            | 534.0                                            | 137123.9                       | 105.5                                            |
| 1400                              | 436.4                                            | 543.4                                            | 149838.5                       | 107.0                                            |
| 1500                              | 443.8                                            | 552.2                                            | 162622.8                       | 108.4                                            |
| 1600                              | 450.9                                            | 560.5                                            | 175465.5                       | 109.7                                            |
| 1700                              | 457.5                                            | 568.3                                            | 188357.4                       | 110.8                                            |
| 1800                              | 463.9                                            | 575.7                                            | 201291.3                       | 111.8                                            |
| 1900                              | 470.0                                            | 582.7                                            | 214261.2                       | 112.8                                            |
| 2000                              | 475.8                                            | 589.4                                            | 227262.1                       | 113.6                                            |
| 2100                              | 481.3                                            | 595.8                                            | 240290.0                       | 114.4                                            |
| 2200                              | 486.7                                            | 601.8                                            | 253341.5                       | 115.2                                            |
| 2300                              | 491.8                                            | 607.7                                            | 266413.6                       | 115.8                                            |
| 2400                              | 496.8                                            | 613.2                                            | 279504.0                       | 116.5                                            |
| 2500                              | 501.5                                            | 618.6                                            | 292610.6                       | 117.0                                            |
| <b><math>\text{BWO}_4</math></b>  |                                                  |                                                  |                                |                                                  |
| 298.15                            | 306.4                                            | 376.2                                            | 20796.8                        | 69.8                                             |
| 1000                              | 408.9                                            | 508.8                                            | 99842.1                        | 99.8                                             |
| 1100                              | 418.5                                            | 520.6                                            | 112245.6                       | 102.0                                            |
| 1200                              | 427.5                                            | 531.5                                            | 124774.5                       | 104.0                                            |
| 1300                              | 435.9                                            | 541.6                                            | 137405.4                       | 105.7                                            |
| 1400                              | 443.8                                            | 551.0                                            | 150120.2                       | 107.2                                            |
| 1500                              | 451.2                                            | 559.8                                            | 162904.5                       | 108.6                                            |
| 1600                              | 458.3                                            | 568.1                                            | 175747.1                       | 109.8                                            |
| 1700                              | 465.0                                            | 575.9                                            | 188639.0                       | 111.0                                            |
| 1800                              | 471.4                                            | 583.3                                            | 201572.8                       | 112.0                                            |

|                  |       |       |          |       |
|------------------|-------|-------|----------|-------|
| 1900             | 477.4 | 590.4 | 214542.5 | 112.9 |
| 2000             | 483.2 | 597.0 | 227543.3 | 113.8 |
| 2100             | 488.8 | 603.4 | 240571.0 | 114.6 |
| 2200             | 494.2 | 609.4 | 253622.2 | 115.3 |
| 2300             | 499.3 | 615.3 | 266694.2 | 116.0 |
| 2400             | 504.3 | 620.8 | 279784.4 | 116.6 |
| 2500             | 509.0 | 626.2 | 292890.8 | 117.2 |
| <hr/>            |       |       |          |       |
| BPO <sub>4</sub> |       |       |          |       |
| <hr/>            |       |       |          |       |
| 298.15           | 262.0 | 322.2 | 17957.6  | 60.2  |
| 1000             | 355.1 | 449.4 | 94230.8  | 94.2  |
| 1100             | 364.2 | 461.0 | 106462.2 | 96.8  |
| 1200             | 372.8 | 471.8 | 118843.8 | 99.0  |
| 1300             | 380.8 | 481.8 | 131347.5 | 101.0 |
| 1400             | 388.3 | 491.1 | 143951.4 | 102.8 |
| 1500             | 395.5 | 499.9 | 156638.3 | 104.4 |
| 1600             | 402.3 | 508.1 | 169394.8 | 105.9 |
| 1700             | 408.7 | 515.9 | 182209.9 | 107.2 |
| 1800             | 414.9 | 523.3 | 195075.0 | 108.4 |
| 1900             | 420.8 | 530.2 | 207982.8 | 109.5 |
| 2000             | 426.4 | 536.9 | 220927.5 | 110.5 |
| 2100             | 431.8 | 543.2 | 233904.3 | 111.4 |
| 2200             | 437.0 | 549.3 | 246909.1 | 112.2 |
| 2300             | 442.0 | 555.0 | 259938.5 | 113.0 |
| 2400             | 446.9 | 560.6 | 272989.6 | 113.8 |
| 2500             | 451.5 | 565.9 | 286059.9 | 114.4 |
| <hr/>            |       |       |          |       |
| BPO <sub>3</sub> |       |       |          |       |
| <hr/>            |       |       |          |       |
| 298.15           | 259.0 | 314.0 | 16417.4  | 55.1  |
| 1000             | 340.0 | 419.4 | 79384.3  | 79.4  |
| 1100             | 347.7 | 428.9 | 89365.8  | 81.2  |
| 1200             | 354.8 | 437.7 | 99461.6  | 82.9  |
| 1300             | 361.5 | 445.8 | 109650.7 | 84.4  |
| 1400             | 367.8 | 453.5 | 119916.7 | 85.7  |
| 1500             | 373.8 | 460.6 | 130246.6 | 86.8  |
| 1600             | 379.4 | 467.3 | 140630.1 | 87.9  |
| 1700             | 384.7 | 473.6 | 151058.9 | 88.9  |

|      |       |       |          |      |
|------|-------|-------|----------|------|
| 1800 | 389.9 | 479.6 | 161526.3 | 89.7 |
| 1900 | 394.7 | 485.3 | 172026.9 | 90.5 |
| 2000 | 399.4 | 490.7 | 182556.1 | 91.3 |
| 2100 | 403.9 | 495.8 | 193110.2 | 92.0 |
| 2200 | 408.2 | 500.7 | 203686.0 | 92.6 |
| 2300 | 412.3 | 505.4 | 214280.9 | 93.2 |
| 2400 | 416.3 | 510.0 | 224892.8 | 93.7 |
| 2500 | 420.1 | 514.3 | 235519.6 | 94.2 |

---

<sup>a</sup>  $\Phi_m^\circ(T) = \{G_m^\circ(T) - H_m^\circ(0\text{ K})\}/T.$

**Table S3** Equilibrium geometry parameters and vibrational frequencies of two isomers of  $\text{BMoO}_4$  calculated at the B3LYP level

| Geometric parameters<br>(Å, deg)      | Structure I<br>( $C_{2v}$ ) | Structure II<br>( $C_s$ ) |
|---------------------------------------|-----------------------------|---------------------------|
| r(Mo-O <sub>2</sub> )                 | 2.217                       | 1.921                     |
| r(Mo-O <sub>4</sub> )                 | 1.685                       | 1.682                     |
| r(B-O <sub>1</sub> )                  | 1.268                       | 1.212                     |
| r(B-O <sub>2</sub> )                  | 1.268                       | 1.311                     |
| ∠(O <sub>1</sub> -Mo-O <sub>2</sub> ) | 65.7                        | -                         |
| ∠(O <sub>3</sub> -Mo-O <sub>4</sub> ) | 113.4                       | 110.9                     |
| ∠(O <sub>1</sub> -B-O <sub>2</sub> )  | 143.1                       | 179.1                     |
| ∠(B-O <sub>2</sub> -Mo)               | 75.6                        | 164.3                     |
|                                       | 122 (B <sub>2</sub> )       | 27 (A'')                  |
|                                       | 145 (A <sub>2</sub> )       | 58 (A')                   |
|                                       | 150 (B <sub>1</sub> )       | 157 (A')                  |
|                                       | 280 (B <sub>2</sub> )       | 192 (A'')                 |
|                                       | 283 (A <sub>1</sub> )       | 322 (A')                  |
| Frequencies (cm <sup>-1</sup> )       | 382 (A <sub>1</sub> )       | 453 (A')                  |
|                                       | 542 (B <sub>1</sub> )       | 511 (A'')                 |
|                                       | 703 (A <sub>1</sub> )       | 531 (A')                  |
|                                       | 979 (B <sub>1</sub> )       | 988 (A'')                 |
|                                       | 1030 (A <sub>1</sub> )      | 1032 (A')                 |
|                                       | 1200 (A <sub>1</sub> )      | 1156 (A')                 |
|                                       | 1815 (B <sub>2</sub> )      | 2059 (A')                 |

**Table S4** Equilibrium geometry parameters and vibrational frequencies of BWO<sub>4</sub> isomers calculated at the B3LYP level

| Geometric parameters<br>(Å, deg)     | Structure I<br>(C <sub>2v</sub> ) | Structure II<br>(C <sub>s</sub> ) | Structure III<br>(C <sub>3v</sub> ) |
|--------------------------------------|-----------------------------------|-----------------------------------|-------------------------------------|
| r(W-O <sub>2</sub> )                 | 2.208                             | 1.925                             | 2.077                               |
| r(W-O <sub>4</sub> )                 | 1.707                             | 1.706                             | 1.739                               |
| r(B-O <sub>1</sub> )                 | 1.273                             | 1.210                             | -                                   |
| r(B-O <sub>2</sub> )                 | 1.273                             | 1.313                             | 1.224                               |
| ∠(O <sub>1</sub> -W-O <sub>2</sub> ) | 65.5                              | -                                 | 109.4                               |
| ∠(O <sub>3</sub> -W-O <sub>4</sub> ) | 111.0                             | 110.4                             | 109.5                               |
| ∠(O <sub>1</sub> -B-O <sub>2</sub> ) | 140.0                             | 179.3                             | -                                   |
| ∠(B-O <sub>2</sub> -W)               | 77.2                              | 166.7                             | 180.0                               |
|                                      | 123 (B <sub>2</sub> )             | 27 (A'')                          | 74 (E)                              |
|                                      | 141 (A <sub>2</sub> )             | 55 (A')                           | 191 (E)                             |
|                                      | 144 (B <sub>1</sub> )             | 138 (A')                          | 250 (A <sub>1</sub> )               |
|                                      | 272 (B <sub>2</sub> )             | 186 (A'')                         | 308 (E)                             |
|                                      | 274 (A <sub>1</sub> )             | 317 (A')                          | 349 (A <sub>1</sub> )               |
| Frequencies<br>(cm <sup>-1</sup> )   | 353 (A <sub>1</sub> )             | 431 (A')                          | 643 (E)                             |
|                                      | 542 (B <sub>1</sub> )             | 509 (A'')                         | 990 (A <sub>1</sub> )               |
|                                      | 693 (A <sub>1</sub> )             | 525 (A')                          | 1674 (A <sub>1</sub> )              |
|                                      | 981 (B <sub>1</sub> )             | 985 (A'')                         |                                     |
|                                      | 1033 (A <sub>1</sub> )            | 1032 (A')                         |                                     |
|                                      | 1187 (A <sub>1</sub> )            | 1165 (A'')                        |                                     |
|                                      | 1777 (B <sub>2</sub> )            | 2068 (A')                         |                                     |

**Table S5** Equilibrium geometry parameters and vibrational frequencies of BPO<sub>4</sub> singlet and triplet structures calculated at the B3LYP level

| Geometric parameters<br>(Å, deg)     | Structure I<br>singlet<br>(C <sub>s</sub> ) | Structure I<br>triplet<br>(C <sub>2v</sub> ) | Structure II<br>triplet<br>(C <sub>s</sub> ) |
|--------------------------------------|---------------------------------------------|----------------------------------------------|----------------------------------------------|
| r(P-O <sub>2</sub> )                 | 1.595                                       | 1.632                                        | 1.628                                        |
| r(P-O <sub>4</sub> )                 | 1.447                                       | 1.500                                        | 1.522                                        |
| r(B-O <sub>1</sub> )                 | 1.202                                       | 1.392                                        | 1.206                                        |
| r(B-O <sub>2</sub> )                 | 1.338                                       | 1.392                                        | 1.326                                        |
| ∠(O <sub>1</sub> -P-O <sub>2</sub> ) | -                                           | 84.2                                         | -                                            |
| ∠(O <sub>3</sub> -P-O <sub>4</sub> ) | 135.6                                       | 105.4                                        | 103.1                                        |
| ∠(O <sub>1</sub> -B-O <sub>2</sub> ) | 176.4                                       | 103.6                                        | 178.9                                        |
| ∠(B-O <sub>2</sub> -P)               | 131.6                                       | 86.1                                         | 136.2                                        |
|                                      | 84 (A'')                                    | 235 (B <sub>1</sub> )                        | 21 (A'')                                     |
|                                      | 98 (A')                                     | 249 (A <sub>2</sub> )                        | 106 (A')                                     |
|                                      | 375 (A')                                    | 349 (A <sub>1</sub> )                        | 268 (A'')                                    |
|                                      | 412 (A')                                    | 398 (B <sub>2</sub> )                        | 314 (A')                                     |
|                                      | 414 (A'')                                   | 486 (B <sub>1</sub> )                        | 408 (A')                                     |
| Frequencies<br>(cm <sup>-1</sup> )   | 503 (A'')                                   | 635 (B <sub>2</sub> )                        | 489 (A'')                                    |
|                                      | 533 (A')                                    | 673 (A <sub>1</sub> )                        | 504 (A')                                     |
|                                      | 724 (A')                                    | 905 (B <sub>1</sub> )                        | 658 (A')                                     |
|                                      | 1115 (A')                                   | 915 (A <sub>1</sub> )                        | 792 (A'')                                    |
|                                      | 1130 (A')                                   | 1137 (A <sub>1</sub> )                       | 1049 (A')                                    |
|                                      | 1478 (A')                                   | 1146 (B <sub>2</sub> )                       | 1128 (A')                                    |
|                                      | 2088 (A')                                   | 1209 (A <sub>1</sub> )                       | 2078 (A')                                    |

**Table S6** Equilibrium geometry parameters and vibrational frequencies of BPO<sub>3</sub> singlet isomers calculated at the B3LYP level

| Geometric parameters<br>(Å, deg)     | Structure I<br>(C <sub>3v</sub> ) | Structure II<br>(C <sub>2v</sub> ) | Structure III<br>(C <sub>s</sub> ) | Structure IV<br>(C <sub>s</sub> ) | Structure V<br>(C <sub>2v</sub> ) |
|--------------------------------------|-----------------------------------|------------------------------------|------------------------------------|-----------------------------------|-----------------------------------|
| R(P-B)                               | 1.762                             | 1.900                              | -                                  | -                                 | 2.186                             |
| r(P-O <sub>1</sub> )                 | 1.723                             | -                                  | -                                  | 1.602                             | -                                 |
| r(B-O <sub>1</sub> )                 | 1.433                             | 1.195                              | 1.208                              | 1.314                             | 1.221                             |
| R(B-O <sub>2</sub> )                 | -                                 | -                                  | 1.324                              | -                                 | 1.570                             |
| r(P-O <sub>2</sub> )                 | -                                 | 1.453                              | 1.661                              | 1.448                             | 1.550                             |
| R(P-O <sub>3</sub> )                 | -                                 | -                                  | 1.456                              | 1.447                             | 1.550                             |
| ∠(O <sub>2</sub> -P-O <sub>3</sub> ) | 102.1                             | 135.4                              | 107.6                              | 135.6                             | 91.8                              |
| ∠(B-O <sub>1</sub> -P)               | 67.1                              | -                                  | -                                  | 150.9                             | -                                 |
| ∠(B-O <sub>2</sub> -P)               | -                                 | -                                  | -                                  | -                                 | 88.9                              |
|                                      | 236 (E)                           | 137 (B <sub>2</sub> )              | 75 (A'')                           | 46 (A'')                          | 203 (B <sub>1</sub> )             |
|                                      | 646 (A <sub>1</sub> )             | 231 (B <sub>1</sub> )              | 102 (A')                           | 99 (A')                           | 252 (B <sub>2</sub> )             |
| Frequencies<br>(cm <sup>-1</sup> )   | 647 (E)                           | 374 (A <sub>1</sub> )              | 357 (A')                           | 404 (A')                          | 388 (B <sub>2</sub> )             |
|                                      | 957 (A <sub>1</sub> )             | 415 (B <sub>1</sub> )              | 504 (A')                           | 409 (A'')                         | 551 (A <sub>1</sub> )             |
|                                      | 1014 (E)                          | 418 (B <sub>2</sub> )              | 512 (A'')                          | 429 (A')                          | 620 (B <sub>1</sub> )             |
|                                      | 1213 (A <sub>1</sub> )            | 577 (A <sub>1</sub> )              | 649 (A')                           | 735 (A')                          | 689 (A <sub>1</sub> )             |
|                                      |                                   | 1159 (A <sub>1</sub> )             | 1101 (A')                          | 1175 (A')                         | 1052 (B <sub>2</sub> )            |
|                                      |                                   | 1470 (B <sub>2</sub> )             | 1312 (A')                          | 1364 (A')                         | 1067 (A <sub>1</sub> )            |
|                                      |                                   | 2028 (A <sub>1</sub> )             | 2068 (A')                          | 1480 (A')                         | 1832 (A <sub>1</sub> )            |
